# Supplementary material for: The Effect of Psychological Distress on Measurement Invariance in Measures of Mental Wellbeing
Source: MDPI journal article supplement (doi:10.3390/ijerph191610072), 2022-08-15
Supplement: s1 [file s1]

**Table S1.** Results of measurement invariance testing in the original MHC-SF factor structure

| Model      | $\chi^2$     | RMSEA | CFI   | TLI  | $\Delta\chi^2$ |
|------------|--------------|-------|-------|------|----------------|
| Configural | 4596.5 (148) | 0.064 | 0.913 | 0.89 | 43.66          |
| Metric     | 4640.2 (159) | 0.062 | 0.913 | 0.90 | $p < 0.0001$   |

**Table S2.** Identification of the source of metric invariance in the original MHC-SF factor structure.

| Relaxed item: | $\chi^2$ | df  | $\Delta\chi^2$ | $\Delta df$ | P       |
|---------------|----------|-----|----------------|-------------|---------|
| 1             | 4638.7   | 158 | 1.5            | 1           | 0.221   |
| 2             | 4622.2   | 158 | 18             | 1           | < .001* |
| 3             | 4631.9   | 158 | 8.3            | 1           | 0.004*  |
| 4             | 4636.1   | 158 | 4.1            | 1           | 0.043*  |
| 5             | 4640     | 158 | 0.2            | 1           | 0.655   |
| 6             | 4635.9   | 158 | 4.3            | 1           | 0.038*  |
| 7             | 4639.7   | 158 | 0.5            | 1           | 0.480   |
| 8             | 4640.2   | 158 | 0              | 1           | 1.00    |
| 9             | 4640.2   | 158 | 0              | 1           | 1.000   |
| 10            | 4639.7   | 158 | 0.5            | 1           | 0.480   |
| 11            | 4639.1   | 158 | 1.1            | 1           | 0.294   |
| 12            | 4627.1   | 158 | 13.1           | 1           | < .001* |
| 13            | 4640.2   | 158 | 0              | 1           | 1.00    |
| 14            | 4634.3   | 158 | 5.9            | 1           | 0.015*  |
